# Supplementary material for: Interacting forces of predation and fishing affect species’ maturation size
Source: PubMed Central journal article supplement (PMC7771143; doi:10.1002/ece3.6995), 2020-12-05

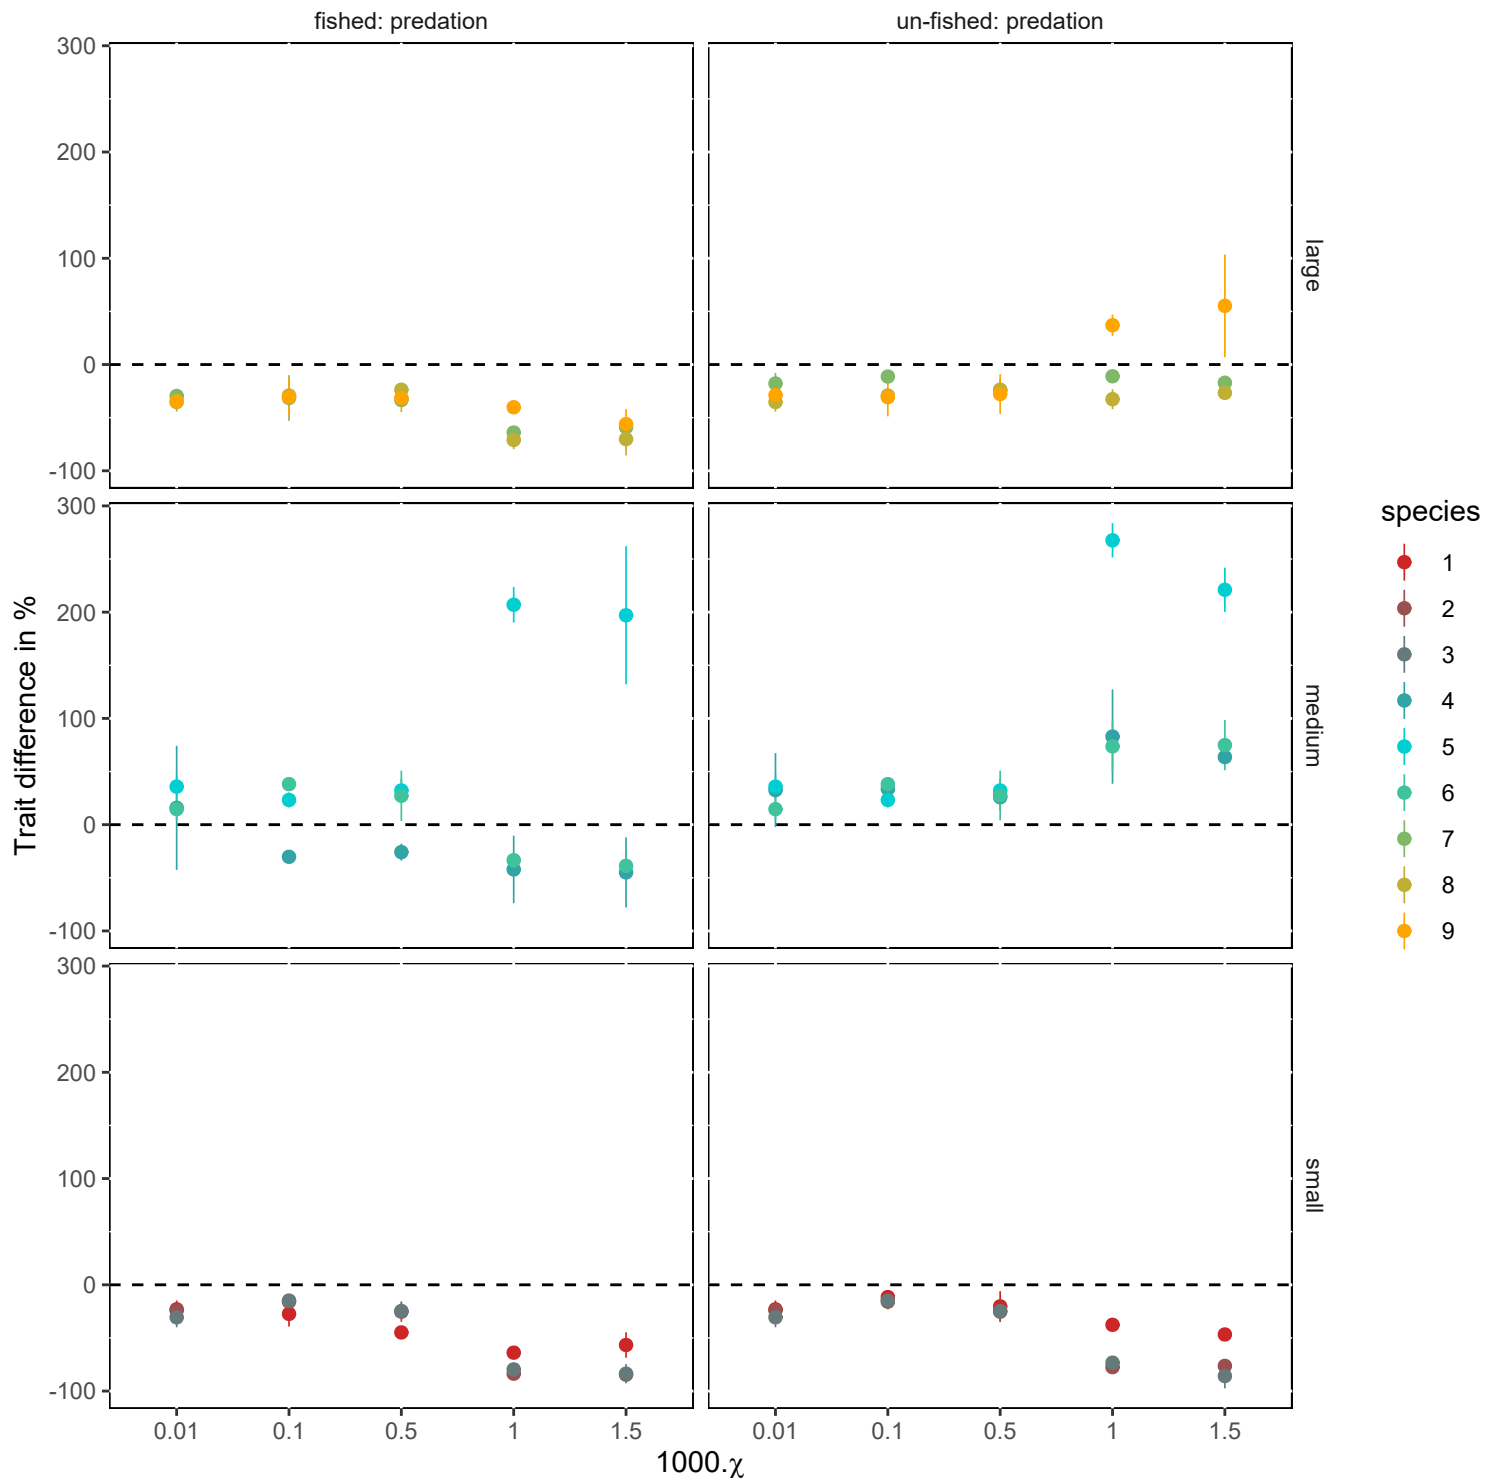

Supplement: ECE3-10-14033-s003.pdf [file ECE3-10-14033-s003.pdf]
