# Supplementary material for: Interacting forces of predation and fishing affect species’ maturation size
Source: PubMed Central journal article supplement (PMC7771143; doi:10.1002/ece3.6995), 2020-12-05
Supplement: ECE3-10-14033-s010.pdf [file ECE3-10-14033-s010.pdf]

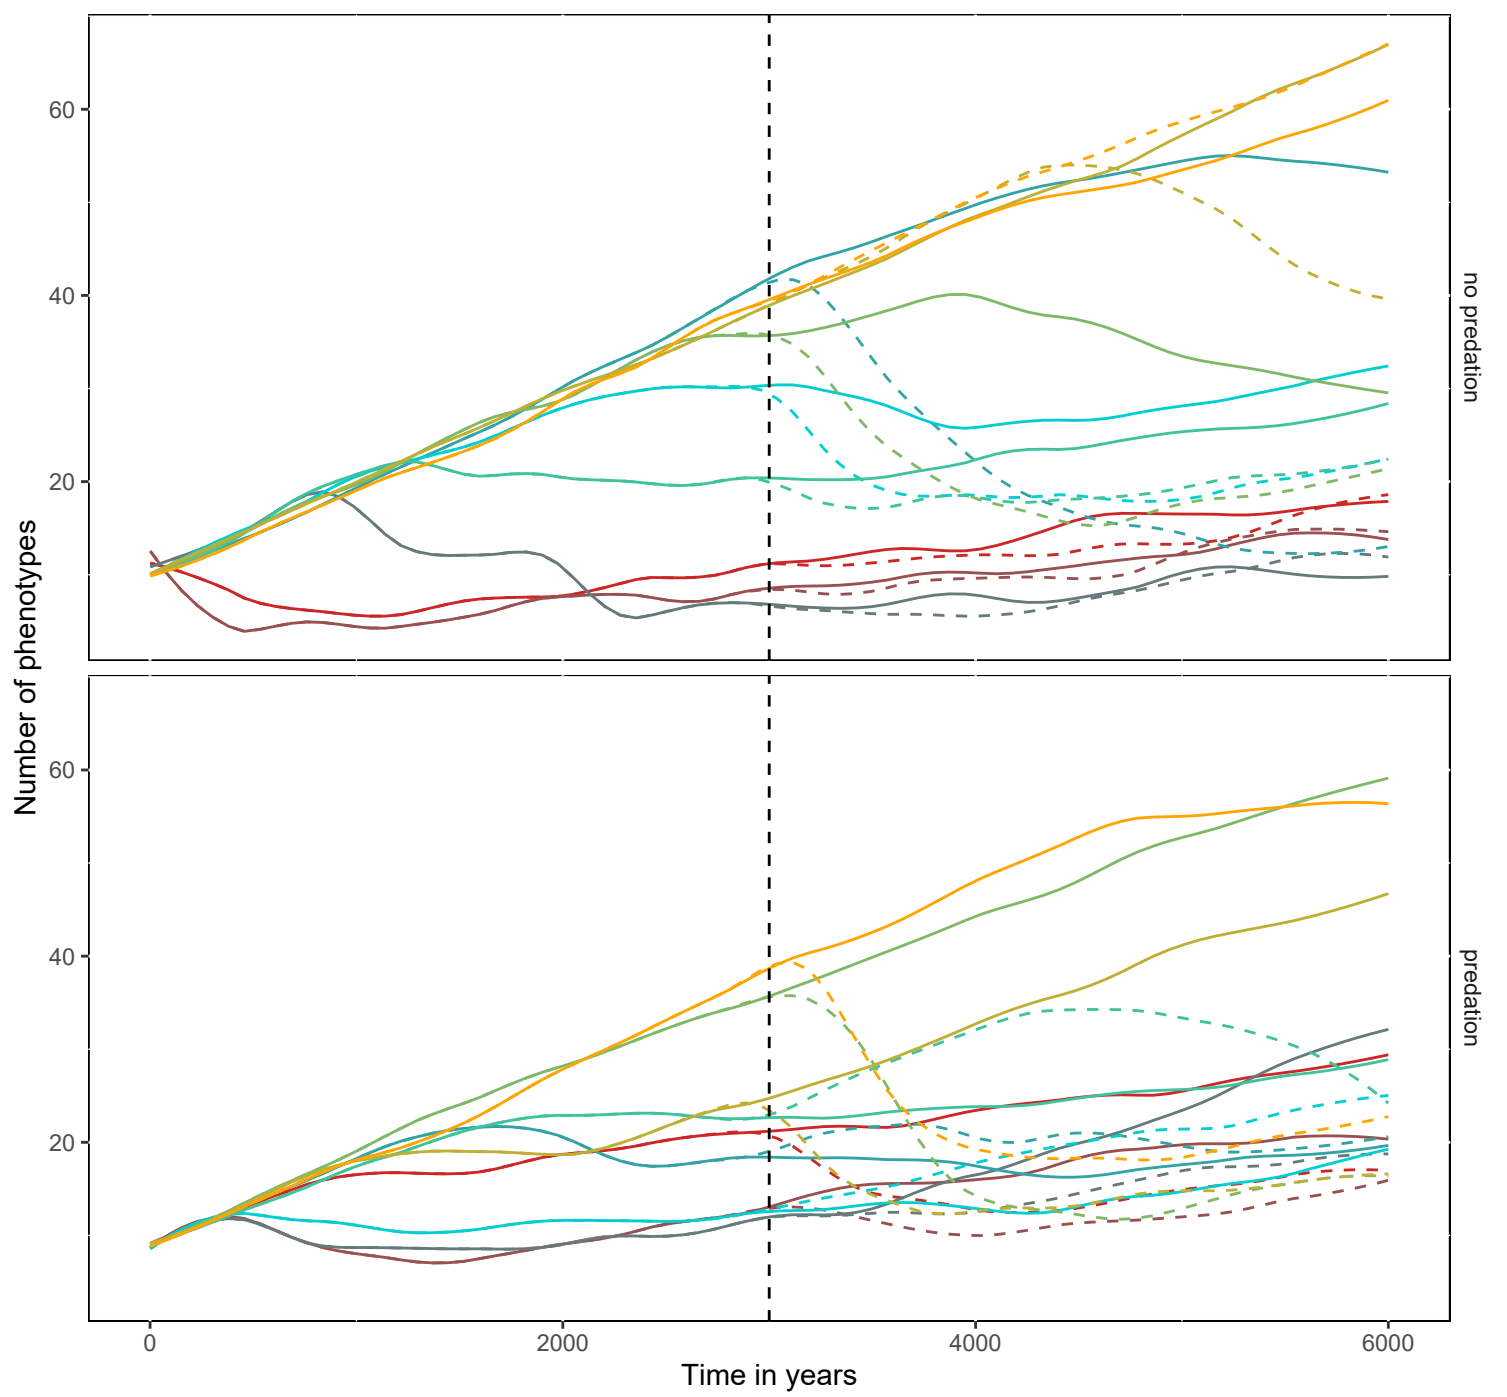

Fisheries -- fished -- un-fished Species -- 1 -- 2 -- 3 -- 4 -- 5 -- 6 -- 7 -- 8 -- 9
