# Supplementary material for: Interacting forces of predation and fishing affect species’ maturation size
Source: PubMed Central journal article supplement (PMC7771143; doi:10.1002/ece3.6995), 2020-12-05
Supplement: ECE3-10-14033-s011.pdf [file ECE3-10-14033-s011.pdf]

a)

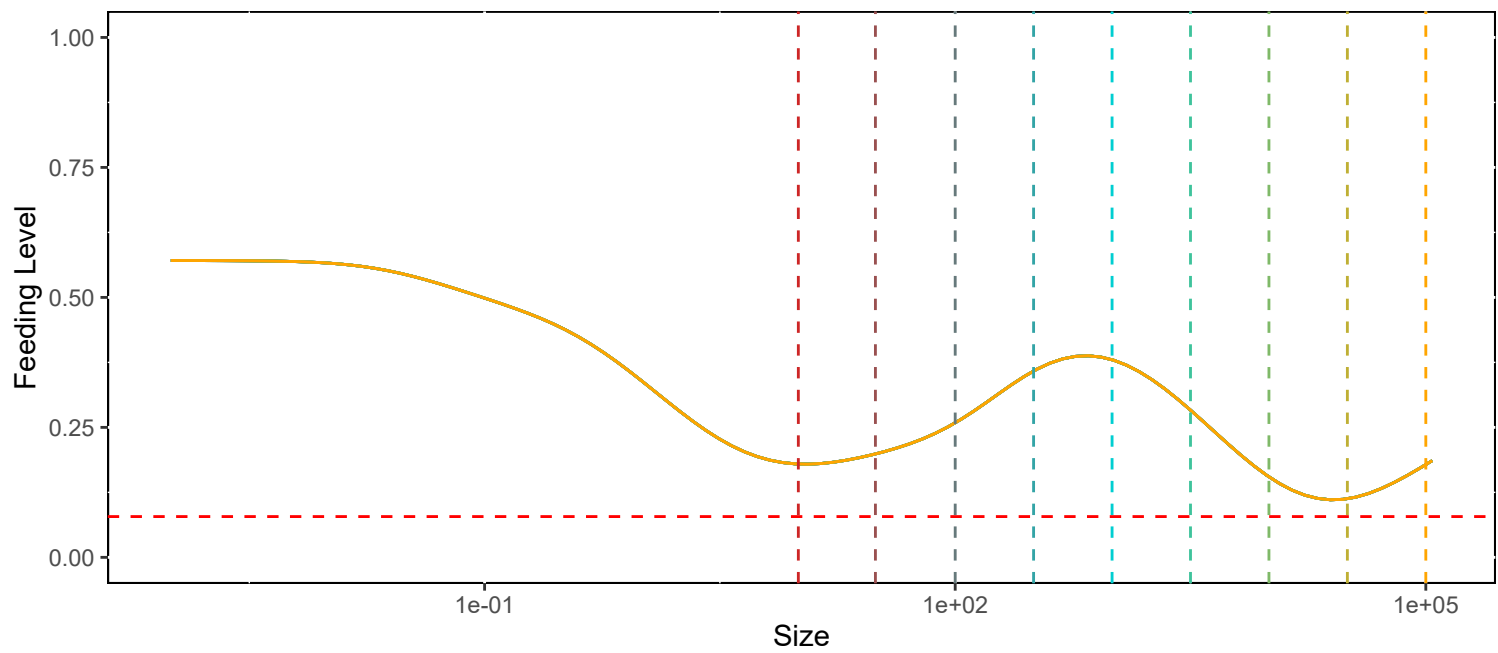

b)

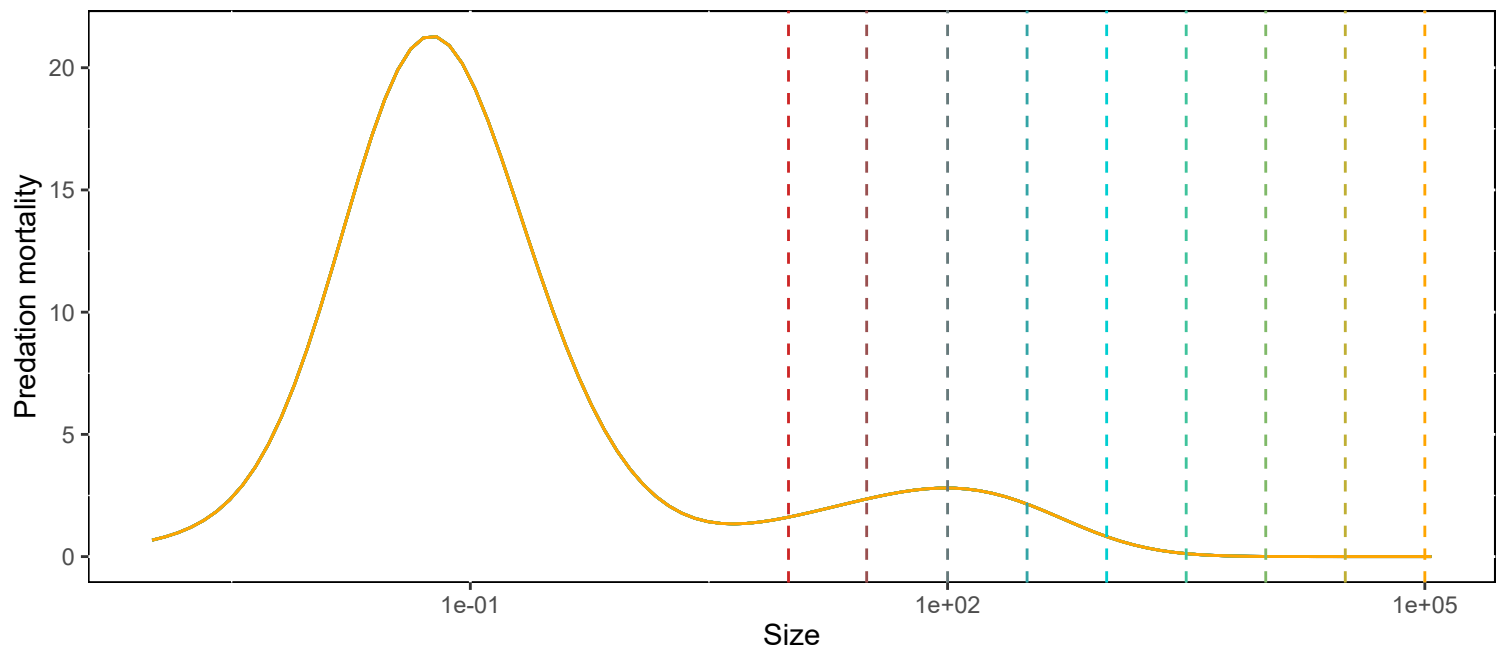

Species 1 2 3 4 5 6 7 8 9
