# Supplementary material for: Interacting forces of predation and fishing affect species’ maturation size
Source: PubMed Central journal article supplement (PMC7771143; doi:10.1002/ece3.6995), 2020-12-05
Supplement: ECE3-10-14033-s013.pdf [file ECE3-10-14033-s013.pdf]

ANOVA table for the 3-way model  $\log(\eta)$  Species\*Predation\*Fishing. Partial effects sizes for each term are also reported (pes). Model is the first line of table S1

|                             | Df  | Sum Sq | Mean Sq | F value | Pr(>F) | pes  |
|-----------------------------|-----|--------|---------|---------|--------|------|
| species                     | 8   | 190.27 | 23.78   | 161.22  | 0      | 0.79 |
| predation                   | 1   | 42.14  | 42.14   | 285.65  | 0      | 0.46 |
| fisheries                   | 1   | 18.36  | 18.36   | 124.5   | 0      | 0.27 |
| species:predation           | 8   | 45.75  | 5.72    | 38.77   | 0      | 0.48 |
| species:fisheries           | 8   | 9.73   | 1.21    | 8.24    | 0      | 0.16 |
| predation:fisheries         | 1   | 1.78   | 1.78    | 12.12   | 0      | 0.03 |
| species:predation:fisheries | 8   | 3.07   | 0.38    | 2.6     | 0.01   | 0.06 |
| Residuals                   | 324 | 47.79  | 0.14    | NA      | NA     | NA   |
