# Supplementary material for: Interacting forces of predation and fishing affect species’ maturation size
Source: PubMed Central journal article supplement (PMC7771143; doi:10.1002/ece3.6995), 2020-12-05
Supplement: ECE3-10-14033-s014.pdf [file ECE3-10-14033-s014.pdf]

Empirical size data and their references used in Fig.6

| Species                      | Maturation size | Asymptotic size | References                |
|------------------------------|-----------------|-----------------|---------------------------|
| Cod                          | 3337.375666     | 19428.63866     | Jennings et al. 1998      |
| Haddock                      | 334.656743      | 3117.98674      | Jennings et al. 1998      |
| Herring                      | 111.102066      | 221.41796       | Goodwin et al. 2006       |
| Norway pout                  | 46.924711       | 86.11638        | Jennings et al. 1998      |
| Plaice                       | 203.236035      | 1496.00467      | Jennings et al. 1998      |
| Saithe                       | 1459.741393     | 45627.15377     | Jennings et al. 1998      |
| Sandeel                      | 3.563648        | 34.52603        | Goodwin et al. 2006       |
| Sole                         | 150.154812      | 684.44291       | Jennings et al. 1998      |
| Sprat                        | 15.674781       | 32.24996        | Bailey 1980               |
| Whiting                      | 60.689          | 612.10952       | Jennings et al. 1998      |
| Dab                          | 21.712738       | 211.24228       | Rijnsdorp et al. 1992     |
| Grey Gurnard                 | 103.313363      | 886.01239       | Fishbase                  |
| Anoplopoma fimbria           | 2243.365824     | 3388.987552     | Olsson and Gislason, 2016 |
| Anoplopoma fimbria           | 2495.410527     | 2591.429307     | Olsson and Gislason, 2016 |
| Sebastes crameri             | 839.2709096     | 1623.941784     | Olsson and Gislason, 2016 |
| Sebastes elongatus           | 114.0872975     | 727.4969882     | Olsson and Gislason, 2016 |
| Sebastes flavidus            | 1159.479145     | 2013.986983     | Olsson and Gislason, 2016 |
| Clupea harengus              | 144.4055108     | 234.7223797     | Olsson and Gislason, 2016 |
| Clupea harengus              | 152.5260593     | 306.5630249     | Olsson and Gislason, 2016 |
| Clupea harengus              | 127.5720137     | 219.7998486     | Olsson and Gislason, 2016 |
| Clupea harengus              | 215.6687028     | 367.248827      | Olsson and Gislason, 2016 |
| Clupea harengus              | 122.5440299     | 245.7383233     | Olsson and Gislason, 2016 |
| Clupea harengus              | 236.954886      | 382.5939548     | Olsson and Gislason, 2016 |
| Clupea harengus              | 240.5513444     | 330.4041016     | Olsson and Gislason, 2016 |
| Clupea pallasii              | 120.1927067     | 215.8984944     | Olsson and Gislason, 2016 |
| Clupea pallasii              | 173.2437888     | 453.506854      | Olsson and Gislason, 2016 |
| Clupea pallasii              | 66.6359996      | 215.8984944     | Olsson and Gislason, 2016 |
| Gadus macrocephalus          | 1448.78265      | 11769.19016     | Olsson and Gislason, 2016 |
| Gadus morhua                 | 5825.230626     | 22718.35315     | Olsson and Gislason, 2016 |
| Gadus morhua                 | 3472.860386     | 20086.52614     | Olsson and Gislason, 2016 |
| Gadus morhua                 | 2288.576711     | 10111.50945     | Olsson and Gislason, 2016 |
| Gadus morhua                 | 2021.927647     | 3262.315803     | Olsson and Gislason, 2016 |
| Gadus morhua                 | 1190.137173     | 1645.589879     | Olsson and Gislason, 2016 |
| Gadus morhua                 | 1768.349977     | 14147.75821     | Olsson and Gislason, 2016 |
| Melanogrammus aeglefinus     | 293.170736      | 3279.323679     | Olsson and Gislason, 2016 |
| Melanogrammus aeglefinus     | 698.1900651     | 2630.904545     | Olsson and Gislason, 2016 |
| Melanogrammus aeglefinus     | 707.9575712     | 3834.294493     | Olsson and Gislason, 2016 |
| Merlangius merlangus         | 179.256487      | 1495.422983     | Olsson and Gislason, 2016 |
| Merlangius merlangus         | 62.34150354     | 620.9007471     | Olsson and Gislason, 2016 |
| Theragra chalcogramma        | 294.78          | 3014.60454      | Olsson and Gislason, 2016 |
| Theragra chalcogramma        | 379.8975        | 730.02          | Olsson and Gislason, 2016 |
| Theragra chalcogramma        | 555.66          | 1509.22542      | Olsson and Gislason, 2016 |
| Trisopterus esmarkii         | 42.4700496      | 76.1849616      | Olsson and Gislason, 2016 |
| Hippoglossoides platessoides | 878.5564359     | 5363.615599     | Olsson and Gislason, 2016 |
| Pleuronectes ferruginae      | 231.7439325     | 623.8158895     | Olsson and Gislason, 2016 |
| Pleuronectes ferruginae      | 141.712941      | 706.969943      | Olsson and Gislason, 2016 |
| Pleuronectes platessa        | 251.4994817     | 2287.908563     | Olsson and Gislason, 2016 |
| Pleuronectes platessa        | 188.4555558     | 1049.062573     | Olsson and Gislason, 2016 |
| Pleuronectes platessa        | 197.3690262     | 1749.712324     | Olsson and Gislason, 2016 |
| Solea solea                  | 134.6253253     | 1233.978732     | Olsson and Gislason, 2016 |
| Solea solea                  | 145.1377053     | 591.8365986     | Olsson and Gislason, 2016 |
| Carcharhinus brevipinna      | 57578.96575     | 178213.8916     | Olsson and Gislason, 2016 |
| Carcharhinus falciformis     | 79173.44259     | 181720.6787     | Olsson and Gislason, 2016 |
| Carcharhinus isodon          | 8814.472849     | 18111.37362     | Olsson and Gislason, 2016 |
| Carcharhinus limbatus        | 15063.79472     | 26326.34765     | Olsson and Gislason, 2016 |
| Carcharhinus sorsrah         | 8153.456825     | 22868.00295     | Olsson and Gislason, 2016 |
| Carcharhinus sorsrah         | 4704.774274     | 11108.36879     | Olsson and Gislason, 2016 |
| Carcharhinus tilstoni        | 11054.41718     | 48226.29158     | Olsson and Gislason, 2016 |
| Galeorhinus galeus           | 13556.40429     | 23279.53846     | Olsson and Gislason, 2016 |
| Mustelus antarcticus         | 5515.412778     | 37633.86675     | Olsson and Gislason, 2016 |
| Mustelus antarcticus         | 5840.80978      | 48712.8062      | Olsson and Gislason, 2016 |
| Prionace glauca              | 203867.6355     | 371380.9422     | Olsson and Gislason, 2016 |
| Menidia menidia              | 2.3             | 9.3             | Conover and Munch, 2002   |
| Menidia menidia              | 3.8             | 10              | Conover and Munch, 2002   |
| Menidia menidia              | 5.2             | 10.5            | Conover and Munch, 2002   |
| Poecilia reticulata          | 0.0761          | 0.590746429     | Reznik et al., 1997       |
| Poecilia reticulata          | 0.0675          | 0.590746429     | Reznik et al., 1997       |
| Poecilia reticulata          | 0.1892          | 3.602635961     | Reznik et al., 1997       |
| Poecilia reticulata          | 0.1623          | 3.602635961     | Reznik et al., 1997       |
| Danio rerio                  | 0.0749          | 0.2134          | Ulloa et al., 2011        |
